# Supplementary material
Source: publisher figshare collection journal article supplement (https://brill.figshare.com/ndownloader/files/31638371)
Supplement: Supplementary file 1 [file 31638371]

## Sheet: Data
Participant_ID	FMS_standard360_baseline	FMS_standard360_duringVR_average	FMS_standard360_duringVR_peak	FMS_standard360_duringVR_post	FMS_copernic360_baseline	FMS_coperninc360_duringVR_average	FMS_coperninc360_duringVR_peak	FMS_coperninc360_duringVR_post	HR_standard360_baseline	HR_standard360_duringVR_average	HR_standard360_duringVR_peak	HR_standard360_duringVR_post	HR_copernic360_baseline	HR_coperninc360_duringVR_average	HR_coperninc360_duringVR_peak	HR_coperninc360_duringVR_post	SSQ_total_standard360	SSQ_total_copernic360	SSQ_nausea_standard360	SSQ_nausea_copernic360	SSQ_oculomotor_standard360	SSQ_oculomotor_copernic360	SSQ_disorientation_standard360	SSQ_disorientation_copernic360
1	0	3.6	4	1	0	3.1	4	2	115	107.95	121	110	109	105.8	134	106	26.18	26.18	19.08	9.54	15.16	15.16	41.76	55.68
2	0	0.25	1	0	0	2.25	6	0	71	93.85	106	86	83	89.75	103	98	14.96	18.7	9.54	0	7.58	22.74	27.84	27.84
3	0	1.4	5	0	0	1	3	2	74	78.2	88	86	83	86.35	103	83	7.48	0	0	0	0	0	27.84	0
4	0	3.35	4	3	0	4.5	6	3	62	72.6	87	77	69	74.35	83	77	74.8	41.14	57.24	28.62	37.9	15.16	125.28	83.52
5	0	3.2	5	5	0	2.5	4	2	76	84.95	101	74	70	74.05	88	75	41.14	26.18	66.78	9.54	15.16	30.32	27.84	27.84
6	0	1.5	2	2	0	1.45	3	1	80	100.05	113	99	89	96.55	111	103	0	0	0	0	0	0	0	0
7	0	3.1	4	4	0	2.9	4	3	115	91.7	115	76	107	90.75	115	96	26.18	37.4	38.16	66.78	15.16	15.16	13.92	13.92
8	0	4.6	6	6	0	1.16	5	3	98	91.4	106	94	97	95.8	101	105	82.28	18.7	66.78	19.08	60.64	7.58	97.44	27.84
9	0	1.7	6	6	0	5.9	10	8	83	89.7	102	89	111	105.8	121	109	29.92	71.06	19.08	28.62	30.32	60.64	27.84	111.36
10	0	15.05	19	17	5	14.75	17	15	83	96.45	119	98	86	91.55	112	116	26.18	63.58	0	19.08	30.32	60.64	41.76	97.44
11	1	2.3	4	4	1	4.95	7	7	94	101.25	107	113	88	95.95	106	98	71.06	63.58	38.16	47.7	60.64	53.06	97.44	69.6
12	0	1.1	2	1	0	1.05	2	1	83	117.65	134	107	128	122.7	158	112	3.74	0	0	0	7.58	0	0	0
13	0	5.2	9	9	0	1.2	4	4	99	110.5	117	115	108	106.25	113	112	52.36	48.62	28.62	19.08	45.48	45.48	69.6	69.6
14	0	1.45	4	0	0	0.25	2	2	96	104.55	110	112	97	106.7	113	110	22.44	26.18	28.62	19.08	15.16	22.74	13.92	27.84
15	2	5.2	6	6	0	5.8	8	8	94	95.8	115	105	86	91.65	99	106	37.4	52.36	28.62	19.08	22.74	53.06	55.68	69.6
16	1	9.5	15	13	0	2.8	5	0	112	115.25	120	122	87	106.3	111	109	86.02	26.18	66.78	19.08	83.38	22.74	69.6	27.84
17	0	1.2	15	1	0	0.05	1	0	113	111.05	124	111	123	127.25	136	137	3.74	3.74	0	0	7.58	7.58	0	0
18	0	0	0	0	0	0	0	0	102	106.55	114	122	88	94.05	109	104	37.4	14.96	9.54	9.54	30.32	7.58	69.6	27.84
19	0	3.15	5	5	0	0	0	0	102	107.75	116	123	94	106.55	114	128	71.06	22.44	47.7	9.54	37.9	15.6	125.28	41.76
20	0	6.7	10	4	0	6.6	12	8	117	104.9	123	113	110	99.45	118	106	29.92	33.66	19.08	19.08	15.16	22.74	55.68	55.68
21	0	1.3	5	0	0	0.25	2	0	124	98.25	102	104	124	112.5	116	124	26.18	26.18	19.08	19.08	15.16	30.32	41.76	13.92
22	0	3.7	6	2	0	6.95	11	1	97	82.5	105	59	103	86.5	103	76	26.18	18.7	28.62	9.54	15.16	15.16	27.84	27.84
23	0	0.15	1	0	0	0.3	2	1	93	94.35	103	111	87	90.15	98	102	7.48	7.48	0	9.54	7.58	7.58	13.92	0
24	0	0.95	2	1	0	4.65	6	6	89	96.8	105	96	96	93.95	108	100	48.62	74.8	76.32	76.32	7.58	37.9	55.68	97.44
25	0	0.25	5	0	0	0	0	0	103	101.5	110	109	109	110.55	129	111	11.22	0	19.08	0	0	0	13.92	0

## Sheet: Legend
Legend
Participant_ID	Participant ID
FMS_standard360_baseline	Fast Motion Sickness scores for standard360-VR condition at baseline
FMS_standard360_duringVR_average	Fast Motion Sickness scores for standard360-VR condition during VR (average value)
FMS_standard360_duringVR_peak	Fast Motion Sickness scores for standard360-VR condition during VR (peak value)
FMS_standard360_duringVR_post	Fast Motion Sickness scores for standard360-VR condition after VR exposure
FMS_copernic360_baseline	Fast Motion Sickness scores for coperninc360-VR condition at baseline
FMS_coperninc360_duringVR_average	Fast Motion Sickness scores for copernic360-VR condition during VR (average value)
FMS_coperninc360_duringVR_peak	Fast Motion Sickness scores for copernic360-VR condition during VR (peak value)
FMS_coperninc360_duringVR_post	Fast Motion Sickness scores for copernic360-VR condition after VR exposure
HR_standard360_baseline	Heart Rate values for standard360-VR condition at baseline
HR_standard360_duringVR_average	Heart Rate values for standard360-VR condition during VR (average value)
HR_standard360_duringVR_peak	Heart Rate values for standard360-VR condition during VR (peak value)
HR_standard360_duringVR_post	Heart Rate values for standard360-VR condition after VR exposure
HR_copernic360_baseline	Heart Rate values for coperninc360-VR condition at baseline
HR_coperninc360_duringVR_average	Heart Rate values for copernic360-VR condition during VR (average value)
HR_coperninc360_duringVR_peak	Heart Rate values for copernic360-VR condition during VR (peak value)
HR_coperninc360_duringVR_post	Heart Rate values for copernic360-VR condition after VR exposure
SSQ_total_standard360	Simulator Sickness Questionnaire Total scores for standard360-VR
SSQ_total_copernic360	Simulator Sickness Questionnaire Total scores for coperninc360-VR
SSQ_nausea_standard360	Simulator Sickness Questionnaire Nausea scores for standard360-VR
SSQ_nausea_copernic360	Simulator Sickness Questionnaire Nausea scores for coperninc360-VR
SSQ_oculomotor_standard360	Simulator Sickness Questionnaire Oculomotor scores for standard360-VR
SSQ_oculomotor_copernic360	Simulator Sickness Questionnaire Oculomotor scores for coperninc360-VR
SSQ_disorientation_standard360	Simulator Sickness Questionnaire Disorientation scores for standard360-VR
SSQ_disorientation_copernic360	Simulator Sickness Questionnaire Disorientation scores for coperninc360-VR
